# Supplementary material for: Poor Prognosis of Diffuse Large B-Cell Lymphoma with Hepatitis C Infection
Source: MDPI journal article supplement (doi:10.3390/jpm11090844), 2021-08-27
Supplement: s1 [file s1]

TableS1: The details of HCV-positive DLBCL patients

| Case No. | Age | Sex | ECOG | Stage | IPI score | B symptoms | Spleen involvement | Liver involvement | Bone marrow involvement | FIB-4 index | Liver cirrhosis | Lymphoma Treatment | Liver toxicity, (grade) | Status at the end of follow-up | Death reason      |
|----------|-----|-----|------|-------|-----------|------------|--------------------|-------------------|-------------------------|-------------|-----------------|--------------------|-------------------------|--------------------------------|-------------------|
| 1        | 80  | F   | 1    | 2     | 2         | No         | No                 | No                | No                      | 4.03        | No              | Yes                | Yes(2)                  | Alive                          |                   |
| 2        | 65  | M   | 0    | 4     | 3         | Yes        | Yes                | No                | No                      | 3.21        | No              | Yes                | Yes(1)                  | Alive                          |                   |
| 3        | 75  | F   | 1    | 4     | 4         | No         | No                 | No                | No                      | 2.44        | No              | Yes                | Yes(2)                  | Alive                          |                   |
| 4        | 71  | M   | 1    | 3     | 3         | Yes        | Yes                | No                | No                      | 2.80        | No              | Yes                | Yes(2)                  | Alive                          |                   |
| 5        | 44  | M   | 0    | 2     | 1         | No         | No                 | No                | No                      | 1.06        | No              | Yes                | Yes(1)                  | Alive                          |                   |
| 6        | 52  | M   | 0    | 4     | 3         | No         | Yes                | No                | Yes                     | 2.30        | No              | Yes                | Yes(1)                  | Alive                          |                   |
| 7        | 63  | F   | 0    | 2     | 1         | Yes        | No                 | No                | No                      | 1.35        | No              | Yes                | Yes(3)                  | Alive                          |                   |
| 8        | 20  | M   | 0    | 4     | 2         | Yes        | Yes                | No                | Yes                     | 1.43        | No              | Yes                | Yes(3)                  | Alive                          |                   |
| 9        | 78  | M   | 1    | 2     | 1         | No         | No                 | No                | No                      | 1.98        | No              | Yes                | Yes(1)                  | Alive                          |                   |
| 10       | 81  | M   | 4    | 4     | 5         | Yes        | Yes                | No                | No                      | 1.08        | No              | No                 | No                      | Alive                          |                   |
| 11       | 91  | F   | 4    | 3     | 5         | Yes        | No                 | No                | No                      | 5.63        | No              | Yes                | Yes(1)                  | Alive                          |                   |
| 12       | 78  | F   | 2    | 4     | 5         | Yes        | Yes                | Yes               | No                      | 3.45        | No              | Yes                | Yes(1)                  | Dead                           | Sepsis, infection |
| 13       | 75  | F   | 1    | 4     | 2         | Yes        | Yes                | Yes               | No                      | 5.22        | Yes, child A    | No                 | No                      | Dead                           | Sepsis, infection |
| 14       | 55  | F   | 1    | 4     | 3         | Yes        | No                 | Yes               | No                      | 7.56        | Yes,            | No                 | No                      | Dead                           | Sepsis,           |

|    |    |   |   |   |   |     |    |     |     |       |                 |     |        |      |                                          |
|----|----|---|---|---|---|-----|----|-----|-----|-------|-----------------|-----|--------|------|------------------------------------------|
|    |    |   |   |   |   |     |    |     |     |       | child B         |     |        |      | infection                                |
| 15 | 83 | M | 1 | 3 | 4 | Yes | No | No  | No  | 5.35  | Yes,<br>child A | Yes | Yes(3) | Dead | Sepsis,<br>infection                     |
| 16 | 83 | F | 1 | 1 | 1 | No  | No | No  | No  | 5.38  | Yes,<br>child A | Yes | Yes(1) | Dead | Sepsis, HCC<br>rupture                   |
| 17 | 63 | F | 1 | 4 | 4 | No  | No | No  | Yes | 2.77  | No              | Yes | Yes(4) | Dead | HCC<br>progression                       |
| 18 | 67 | F | 1 | 2 | 3 | Yes | No | No  | No  | 3.69  | Yes,<br>child A | Yes | Yes(3) | Dead | GI bleeding<br>due to liver<br>cirrhosis |
| 19 | 82 | M | 1 | 2 | 1 | No  | No | No  | No  | 2.46  | No              | Yes | Yes(4) | Dead | Sepsis,<br>infection                     |
| 20 | 38 | M | 4 | 4 | 4 | Yes | No | Yes | No  | 10.99 | No              | Yes | Yes(3) | Dead | Lymphoma<br>progression                  |
| 21 | 60 | F | 1 | 4 | 3 | Yes | No | No  | Yes | 1.68  | No              | Yes | Yes(3) | Dead | Sepsis,<br>infection                     |
| 22 | 75 | F | 0 | 2 | 1 | No  | No | No  | No  | 1.63  | No              | Yes | Yes(1) | Dead | Sepsis,<br>infection                     |

\*F: female, M: male, ECOG: Eastern Cooperative Oncology Group, IPI: international prognostic index, FIB-4: fibrosis-4, HCC: hepatocellular carcinoma, GI: gastrointestinal
